# Supplementary material
Source: MDPI journal article supplement (https://www.mdpi.com/2071-1050/14/4/2442)
Supplement: s1 [file s1]

# Estimating China's population over 21<sup>st</sup> century under climate change: Spatially explicit scenarios consistent with the Shared Socioeconomic Pathways (SSPs)

## Supplementary information

### Figures

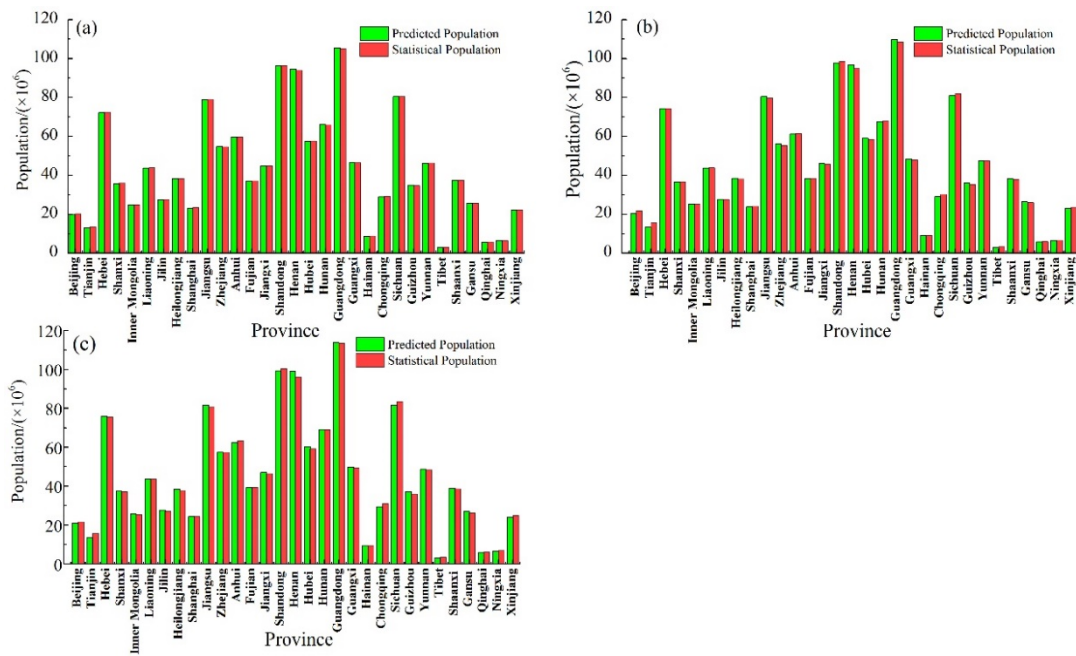

Figure S1 Comparison of the population projections for China in the SSP2 scenario and the statistical values of the total population: (a) 2011; (b) 2015; (c) 2018.

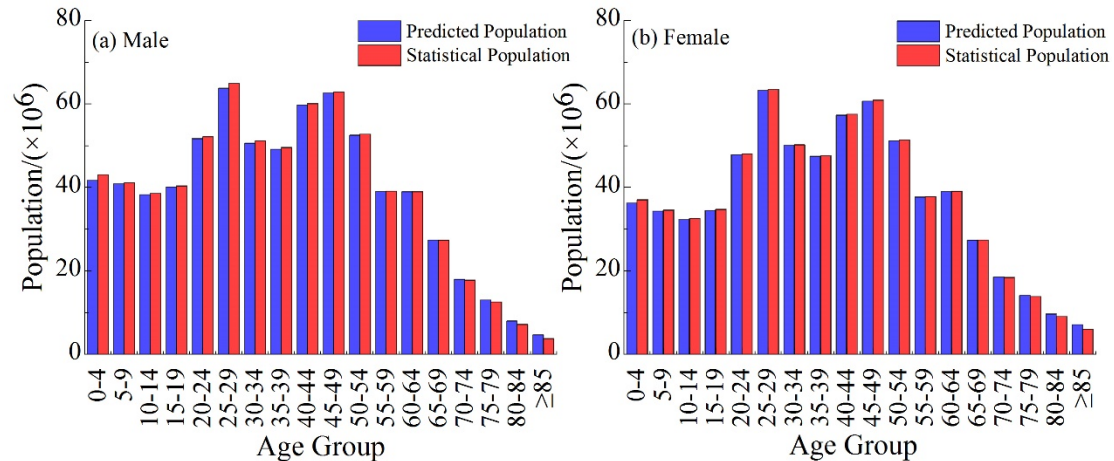

Figure S2 Comparison of population projections of 18 age groups in China in 2015 in the SSP2 scenario and in the statistical data: (a) men; (b) women.

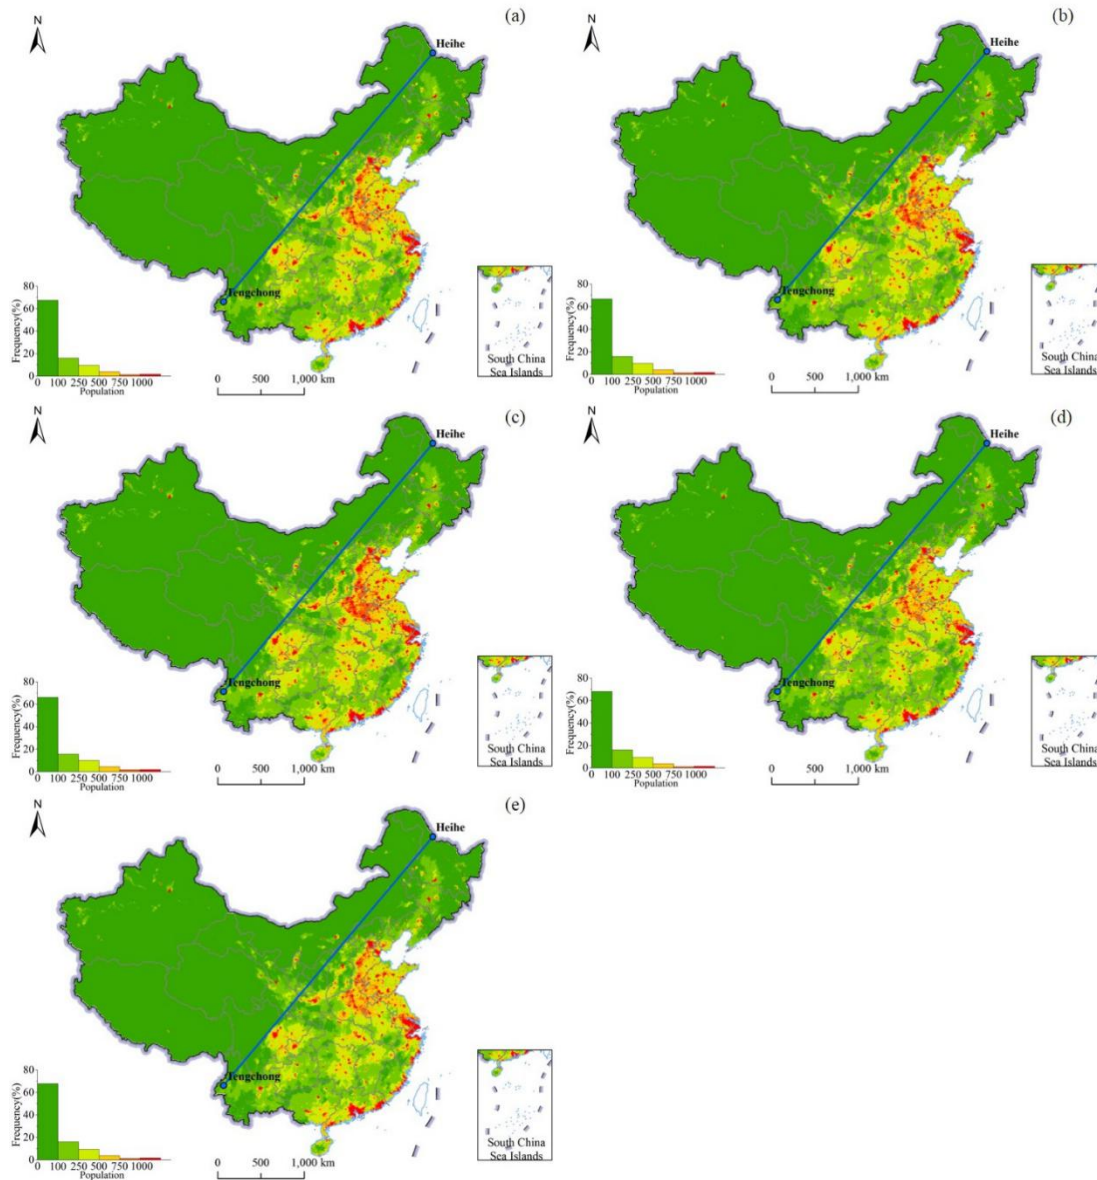

Figure S3 Spatial distribution of population projections for China in 2050 under the five shared socioeconomic pathways (SSPs): (a) SSP1; (b) SSP2; (c) SSP3; (d) SSP4; (e) SSP5 (Blue line is the Hu line, an imaginary line that diagonally divides the area of China into two parts, stretching from the city of Heihe in Heilongjiang Province to Tengchong in Yunnan Province, which is also called the “geo-demographic demarcation line”).

## Tables

Table S1 Total fertility rate of China under different assumptions during 2011-2050

| Fertility | Low       | Medium    | High      |
|-----------|-----------|-----------|-----------|
| 2011-2015 | 1248-1520 | 1264-1600 | 1280-1680 |
| 2016-2020 | 1550-1670 | 1675-1850 | 1752-2040 |
| 2021-2025 | 1642-1530 | 1840-1800 | 2046-2070 |
| 2026-2030 | 1512-1440 | 1800      | 2088-2160 |
| 2031-2035 | 1436-1420 | 1800      | 2164-2180 |
| 2036-2040 | 1416-1400 | 1800      | 2184-2200 |
| 2041-2045 | 1394-1370 | 1800      | 2206-2230 |
| 2046-2050 | 1366-1350 | 1800      | 2234-2250 |

Table S2 Low assumption: Fertility rate of women of childbearing age by age group (%)

| Age group | 15-19 | 20-24 | 25-29  | 30-34 | 35-39 | 40-44 | 45-49 |
|-----------|-------|-------|--------|-------|-------|-------|-------|
| 2015      | 7.63  | 89.40 | 108.21 | 58.99 | 24.08 | 9.66  | 6.02  |
| 2020      | 8.38  | 98.23 | 118.88 | 64.81 | 26.45 | 10.62 | 6.62  |
| 2025      | 7.68  | 89.99 | 108.92 | 59.38 | 24.24 | 9.73  | 6.06  |
| 2030      | 7.23  | 84.70 | 102.51 | 55.89 | 22.81 | 9.16  | 5.71  |
| 2035      | 7.13  | 83.52 | 101.09 | 55.11 | 22.49 | 9.03  | 5.63  |
| 2040      | 7.03  | 82.35 | 99.66  | 54.34 | 22.18 | 8.90  | 5.55  |
| 2045      | 6.88  | 80.58 | 97.53  | 53.17 | 21.70 | 8.71  | 5.43  |
| 2050      | 6.78  | 79.40 | 96.10  | 52.40 | 21.39 | 8.58  | 5.35  |

Table S3 Medium assumption: Fertility rate of women of childbearing age by age group (%)

| Age group<br>(Years) | 15-19 | 20-24  | 25-29  | 30-34 | 35-39 | 40-44 | 45-49 |
|----------------------|-------|--------|--------|-------|-------|-------|-------|
| 2015                 | 8.03  | 94.11  | 113.90 | 62.10 | 25.35 | 10.17 | 6.34  |
| 2020                 | 9.29  | 108.81 | 131.70 | 71.80 | 29.31 | 11.76 | 7.33  |
| 2025-2050            | 9.04  | 105.87 | 128.14 | 69.86 | 28.51 | 11.45 | 7.13  |

Table S4 High assumption: Fertility rate of women of childbearing age by age group (%)

| Age group<br>(Years) | 15-19 | 20-24  | 25-29  | 30-34 | 35-39 | 40-44 | 45-49 |
|----------------------|-------|--------|--------|-------|-------|-------|-------|
| 2015                 | 8.43  | 98.81  | 119.60 | 65.20 | 26.61 | 10.68 | 6.66  |
| 2020                 | 10.24 | 119.99 | 145.22 | 79.18 | 32.32 | 12.97 | 8.08  |
| 2025                 | 10.39 | 121.75 | 147.36 | 80.34 | 32.79 | 13.16 | 8.20  |
| 2030                 | 10.84 | 127.05 | 153.77 | 83.83 | 34.22 | 13.73 | 8.56  |
| 2035                 | 10.95 | 128.22 | 155.19 | 84.61 | 34.53 | 13.86 | 8.64  |
| 2040                 | 11.05 | 129.40 | 156.61 | 85.38 | 34.85 | 13.99 | 8.72  |
| 2045                 | 11.20 | 131.16 | 158.75 | 86.55 | 35.33 | 14.18 | 8.84  |
| 2050                 | 11.30 | 132.34 | 160.17 | 87.33 | 35.64 | 14.31 | 8.92  |

Table S5 Provinces grouping with different educational attainment

| Education attainment | Province                                                                                             |
|----------------------|------------------------------------------------------------------------------------------------------|
| low                  | Chongqing, Xinjiang, Ningxia, Hainan, Qinghai, Jiangxi, Tibet, Yunnan, Gansu, Guizhou                |
| medium               | Hebei, Hubei, Heilongjiang, Henan, Hunan, Sichuan, Anhui, Guangxi, Shaanxi, Jilin, Shanxi            |
| high                 | Shanghai, Beijing, Tianjin, Zhejiang, Jiangsu, Guangdong, Inner Mongolia, Shandong, Liaoning, Fujian |

Table S6 Evaluation of total population errors during 2011–2019.

| Year | Predicted pollution ( $\times 10^6$ ) | Statistical pollution ( $\times 10^6$ ) | Relative error (%) |
|------|---------------------------------------|-----------------------------------------|--------------------|
| 2011 | 1339.65                               | 1347.35                                 | 0.57               |
| 2012 | 1347.79                               | 1354.04                                 | 0.46               |
| 2013 | 1353.96                               | 1360.72                                 | 0.50               |
| 2014 | 1361.67                               | 1367.82                                 | 0.45               |
| 2015 | 1370.86                               | 1374.62                                 | 0.27               |
| 2016 | 1381.36                               | 1382.71                                 | 0.10               |
| 2017 | 1393.14                               | 1390.08                                 | 0.22               |
| 2018 | 1400.00                               | 1395.38                                 | 0.33               |
| 2019 | 1408.30                               | 1400.05                                 | 0.59               |

Table S7 Correlation between the statistical evaluation indicators of the predicted and statistical total populations during 2011–2019.

| Year      | $R^2$ | $RMSE (\times 10^9)$ | $NSE$ | $RSR$ | $PBIAS$ |
|-----------|-------|----------------------|-------|-------|---------|
| 2011–2019 | 0.99  | 0.01                 | 0.89  | 0.33  | 0.13    |

Table S8 Statistical evaluation indicators of provincial population in 2011, 2015, and 2018.

| Year | $R^2$ | $RMSE (\times 10^6)$ | $NSE$ | $RSR$ | $PBIAS$ |
|------|-------|----------------------|-------|-------|---------|
| 2011 | 1.00  | 0.20                 | 1.00  | 0.01  | 0.06    |
| 2015 | 1.00  | 0.75                 | 1.00  | 0.03  | 0.00    |
| 2018 | 1.00  | 0.97                 | 1.00  | 0.03  | −0.25   |

Table S9 Statistical evaluation indicators of 18 different age groups and two genders in the population of China in 2015.

| Gender | $R^2$ | $RMSE (\times 10^6)$ | $NSE$ | $RSR$ | $PBIAS$ |
|--------|-------|----------------------|-------|-------|---------|
| Men    | 1.00  | 0.59                 | 1.00  | 0.03  | 0.46    |
| Women  | 1.00  | 0.39                 | 1.00  | 0.02  | 0.13    |

Table S10 Values of the statistical evaluation indicators at the county level following spatialization.

| Year | $R^2$ | $RMSE (\times 10^6)$ | $NSE$ | $RSR$ | $PBIAS$ |
|------|-------|----------------------|-------|-------|---------|
| 2015 | 0.90  | 0.14                 | 0.90  | 0.32  | 0.08    |
